# Supplementary material for: Facile synthesis of silver submicrospheres and their applications
Source: Royal Society of Chemistry journal article supplement (doi:10.1039/c5ra18513k), 2015-01-01
Supplement: c5ra18513k1.pdf [file c5ra18513k1.pdf]

Supporting information

**Facile Synthesis of Silver Submicrospheres and Their Applications**

Bin Tang,<sup>a,b</sup> Jingliang Li,<sup>\*b</sup> Linpeng Fan<sup>b</sup> and Xungai Wang<sup>\*a,b</sup>

<sup>a</sup>. School of Textile Science and Engineering, Wuhan Textile University, Wuhan 430073, China.

<sup>b</sup>. Institute for Frontier Materials, Deakin University, Geelong, Victoria 3216, Australia.

\*Corresponding author. E-mail: [xungai.wang@deakin.edu.au](mailto:xungai.wang@deakin.edu.au); [jingliang.li@deakin.edu.au](mailto:jingliang.li@deakin.edu.au).

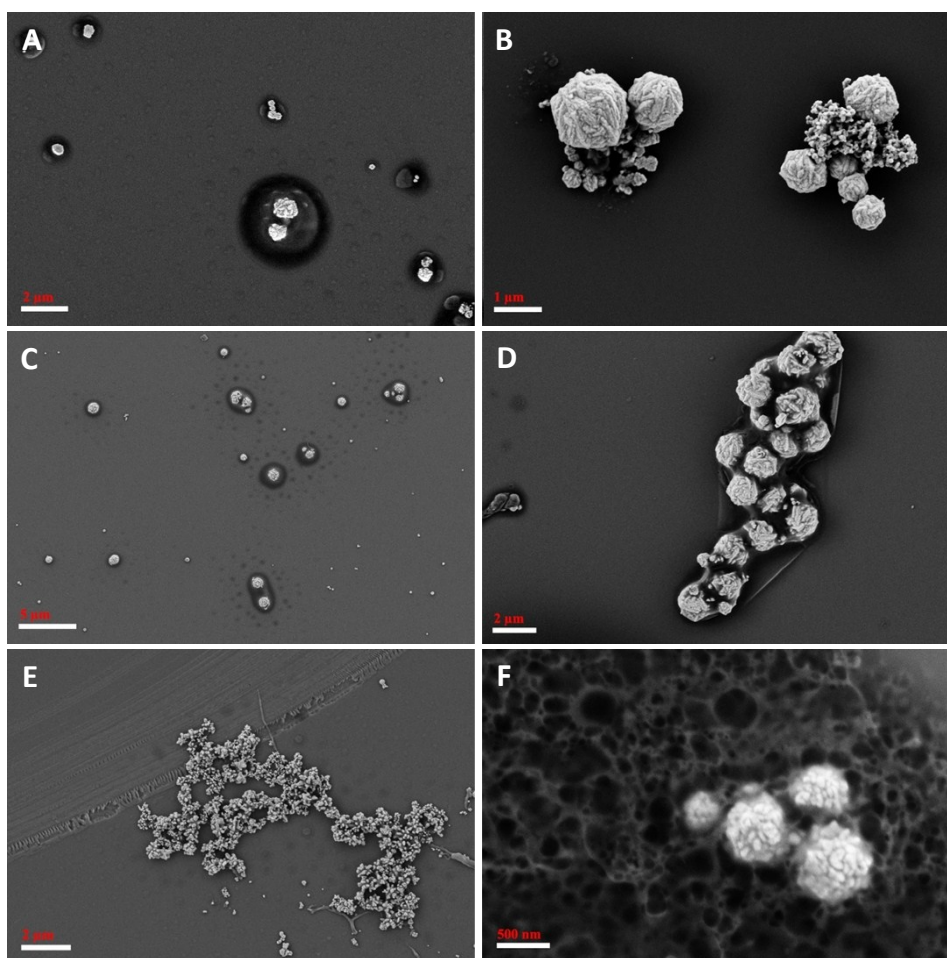

**Fig. S1** SEM images of silver particles obtained by mixing ascorbic acid ( $2.86 \times 10^{-2}$  M) and  $\text{AgNO}_3$  in the absence of Tween 20 corresponding to  $\text{AgNO}_3$  concentrations: (A, B)  $3.6 \times 10^{-3}$  M, (C, D)  $1.8 \times 10^{-3}$  M and (E, F)  $3.6 \times 10^{-4}$  M.

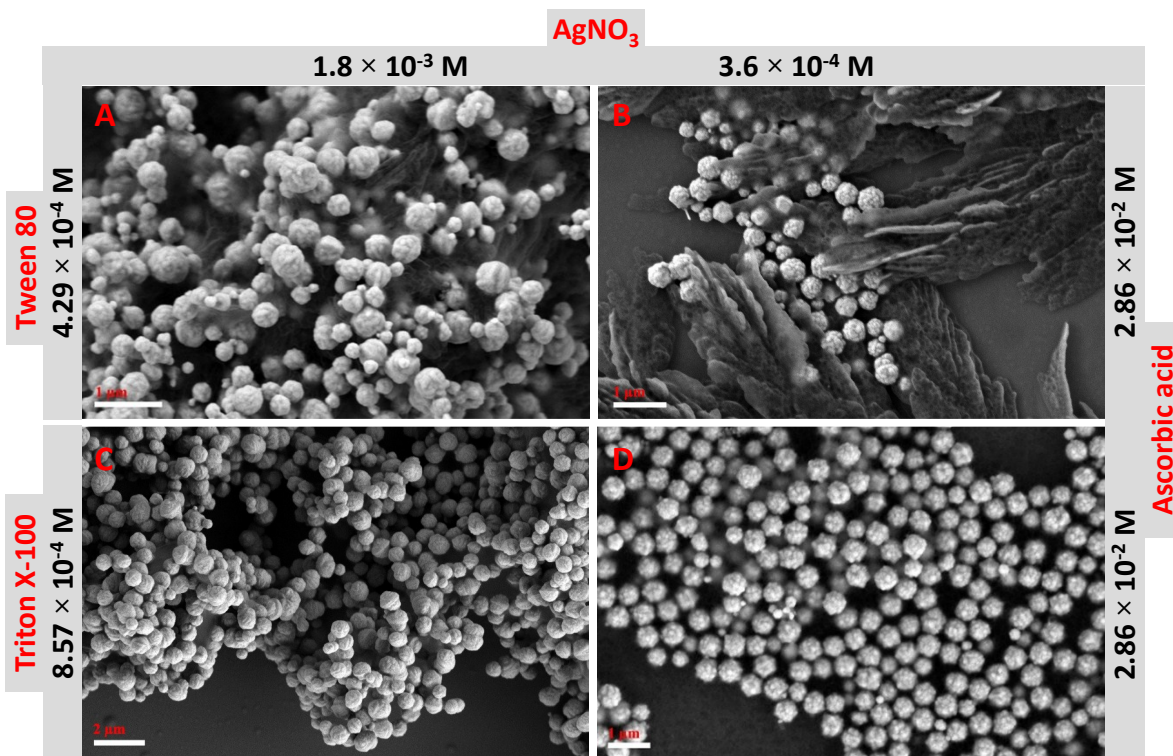

**Fig. S2** SEM images of silver particles synthesized through reduction of silver ions by ascorbic acid in the presence of Tween 80 and Triton X-100.

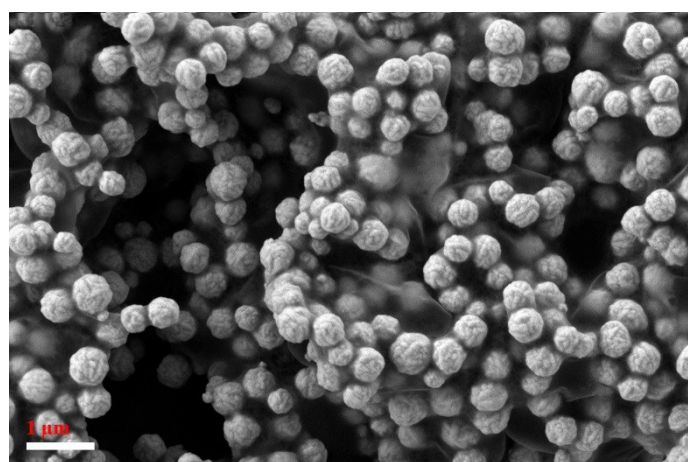

**Fig. S3** SEM image of silver particles synthesized through reduction of silver ions ( $1.8 \times 10^{-3} \text{ M}$ ) by ascorbic acid ( $2.86 \times 10^{-2} \text{ M}$ ) in the presence of Tergitol 15-S-7 ( $1.81 \times 10^{-3} \text{ M}$ ).

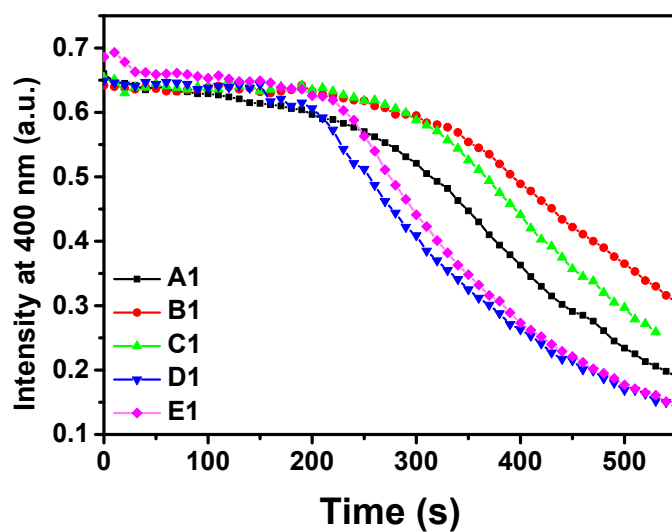

**Fig. S4** Intensity of the absorption peak for 4-NP (400 nm) as a function of time in the presence of different silver submicroparticles.
